# Supplementary material for: Modeling the Missing DBHs: Influence of Model Form on UAV DBH Characterization
Source: MDPI journal article supplement (doi:10.3390/f13122077), 2022-12-06
Supplement: s1 [file s1]

**Table S1.** Metashape setting for UAV structure from motion processing in the Align Photos, Optimized Alignment, and Build Dense Cloud steps.

| Parameter                     | Setting |
|-------------------------------|---------|
| Align Photos                  |         |
| Accuracy                      | Highest |
| Generic Preselection          | Yes     |
| Reference Preselection        | Source  |
| Reset Current Alignment       | No      |
| Key Point Limit               | 40,000  |
| Tie Point Limit               | 4,000   |
| Apply Mask To                 | None    |
| Exclude Stationary Tie Points | Yes     |
| Guided Image Matching         | No      |
| Adaptive Camera Model Fitting | Yes     |
| Optimized Alignment           |         |
| Fit F                         | Yes     |
| Fit cx, cy                    | Yes     |
| Fit b1, b2                    | No      |
| Fit K1, K2, K3                | Yes     |
| Fit K4                        | No      |
| Fit p1, p2                    | Yes     |
| Fit Additional Corrections    | No      |
| Adaptive Camera Model Fitting | Yes     |
| Build Dense Cloud             |         |
| Quality                       | High    |
| Reuse depth maps              | Yes     |
| Depth Filtering               | Mild    |
| Calculate point colour        | Yes     |
| Calculate point confidence    | No      |
